# Supplementary material for: Fungal Tracheobronchitis in Lung Transplant Recipients: Incidence and Utility of Diagnostic Markers
Source: MDPI journal article supplement (doi:10.3390/jof9010003), 2022-12-20
Supplement: s1 [file s1]

**Figure S1.** ROC curve analyses to assess the ability of the different diagnostic markers to discriminate (A) *Candida* tracheobronchitis from colonization, (B) *Candida* tracheobronchitis from colonization or no evidence of fungi, (C) *Aspergillus* tracheobronchitis from colonization and (D) *Aspergillus* tracheobronchitis from colonization or no evidence of fungi.

A

Betaglucan in serum  
*Candida* tracheobronchitis vs colonization

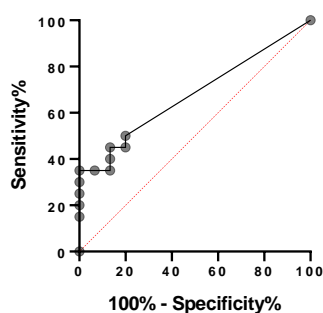

| Area under the ROC curve                          |                  |
|---------------------------------------------------|------------------|
| Area                                              | 0.6767           |
| Std. Error                                        | 0.09010          |
| 95% confidence interval                           | 0.5001 to 0.8533 |
| P value                                           | 0.0773           |
| Data                                              |                  |
| Controls ( <i>Candida</i> colonization n=15)      | 15               |
| Patients ( <i>Candida</i> tracheobronchitis n=20) | 20               |

Betaglucan in BALF  
*Candida* tracheobronchitis vs colonization

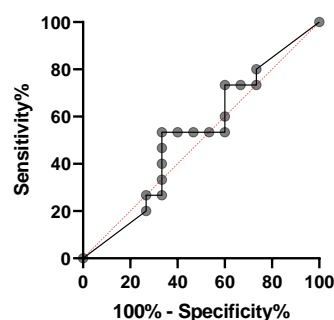

| Area under the ROC curve                          |                  |
|---------------------------------------------------|------------------|
| Area                                              | 0.5244           |
| Std. Error                                        | 0.1081           |
| 95% confidence interval                           | 0.3126 to 0.7363 |
| P value                                           | 0.8195           |
| Data                                              |                  |
| Controls ( <i>Candida</i> colonization n=15)      | 15               |
| Patients ( <i>Candida</i> tracheobronchitis n=15) | 15               |

Neutrophils in BALF  
*Candida* tracheobronchitis vs colonization

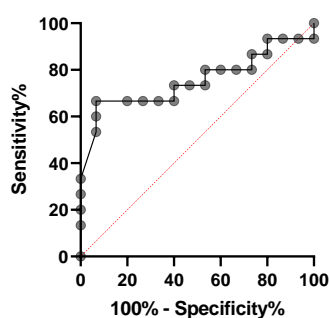

| Area under the ROC curve                          |                  |
|---------------------------------------------------|------------------|
| Area                                              | 0.7533           |
| Std. Error                                        | 0.09515          |
| 95% confidence interval                           | 0.5668 to 0.9398 |
| P value                                           | 0.0181           |
| Data                                              |                  |
| Controls ( <i>Candida</i> colonization n=15)      | 15               |
| Patients ( <i>Candida</i> tracheobronchitis n=15) | 15               |

B

Betaglucan in serum  
*Candida* tracheobronchitis vs  
colonization or no evidence of fungi

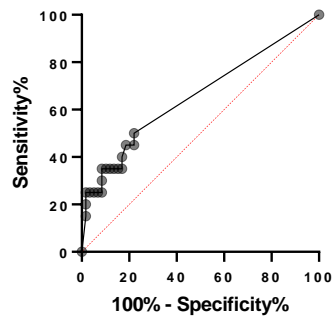

| Area under the ROC curve                          |                |
|---------------------------------------------------|----------------|
| Area                                              | 0.655          |
| Std. Error                                        | 0.0765         |
| 95% confidence interval                           | 0.505 to 0.805 |
| P value                                           | 0.0391         |
| Data                                              |                |
| Controls (CandCol+NoFungi)                        | 59             |
| Patients ( <i>Candida</i> tracheobronchitis n=20) | 20             |

Betaglucan in BALF  
*Candida* tracheobronchitis vs  
colonization or no evidence of fungi

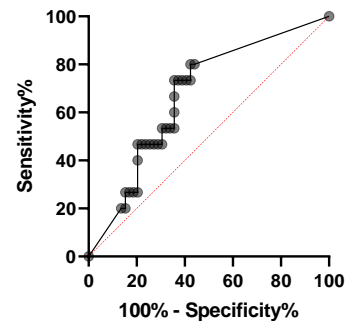

| Area under the ROC curve                          |                  |
|---------------------------------------------------|------------------|
| Area                                              | 0.6718           |
| Std. Error                                        | 0.07341          |
| 95% confidence interval                           | 0.5279 to 0.8156 |
| P value                                           | 0.0410           |
| Data                                              |                  |
| Controls (CandCol+NoFungi)                        | 59               |
| Patients ( <i>Candida</i> tracheobronchitis n=15) | 15               |

Neutrophils in BALF  
*Candida* tracheobronchitis vs  
colonization or no evidence of fungi

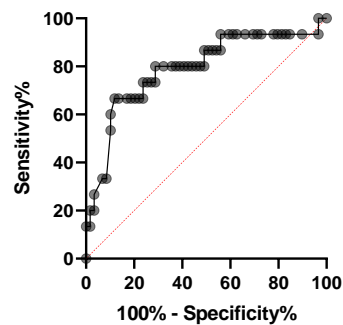

| Area under the ROC curve                          |                  |
|---------------------------------------------------|------------------|
| Area                                              | 0.7910           |
| Std. Error                                        | 0.07274          |
| 95% confidence interval                           | 0.6484 to 0.9335 |
| P value                                           | 0.0005           |
| Data                                              |                  |
| Controls (CandCol+NoFungi)                        | 59               |
| Patients ( <i>Candida</i> tracheobronchitis n=15) | 15               |

C

Betaglucan in serum  
*Aspergillus* tracheobronchitis vs colonization

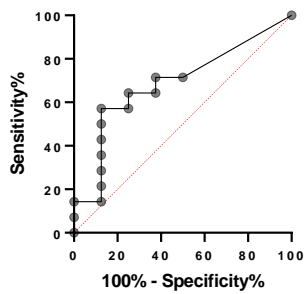

|                                                       |                  |
|-------------------------------------------------------|------------------|
| Area under the ROC curve                              |                  |
| Area                                                  | 0.6875           |
| Std. Error                                            | 0.1190           |
| 95% confidence interval                               | 0.4543 to 0.9207 |
| P value                                               | 0.1518           |
| Data                                                  |                  |
| Controls ( <i>Aspergillus</i> colonization n=8)       | 8                |
| Patients ( <i>Aspergillus</i> tracheobronchitis n=14) | 14               |

Betaglucan in BALF  
*Aspergillus* tracheobronchitis vs colonization

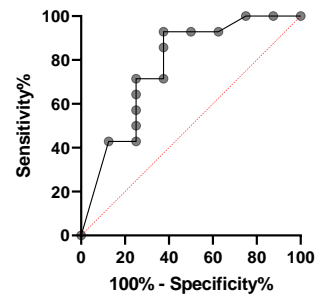

|                                                       |                  |
|-------------------------------------------------------|------------------|
| Area under the ROC curve                              |                  |
| Area                                                  | 0.7723           |
| Std. Error                                            | 0.1133           |
| 95% confidence interval                               | 0.5502 to 0.9944 |
| P value                                               | 0.0374           |
| Data                                                  |                  |
| Controls ( <i>Aspergillus</i> colonization n=8)       | 8                |
| Patients ( <i>Aspergillus</i> tracheobronchitis n=14) | 14               |

Neutrophils in BALF  
*Aspergillus* tracheobronchitis vs colonization

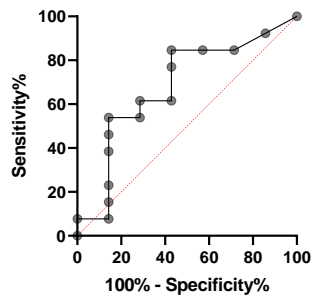

|                                                       |                  |
|-------------------------------------------------------|------------------|
| Area under the ROC curve                              |                  |
| Area                                                  | 0.6813           |
| Std. Error                                            | 0.1330           |
| 95% confidence interval                               | 0.4206 to 0.9420 |
| P value                                               | 0.1910           |
| Data                                                  |                  |
| Controls ( <i>Aspergillus</i> colonization n=7)       | 7                |
| Patients ( <i>Aspergillus</i> tracheobronchitis n=13) | 13               |

Galactomannan in BALF  
*Aspergillus* tracheobronchitis from colonization

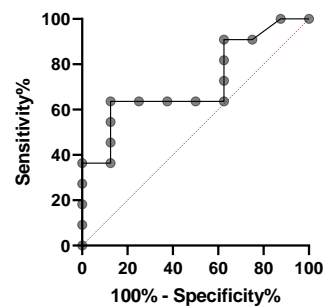

|                                                       |                  |
|-------------------------------------------------------|------------------|
| Area under the ROC curve                              |                  |
| Area                                                  | 0.7216           |
| Std. Error                                            | 0.1197           |
| 95% confidence interval                               | 0.4870 to 0.9562 |
| P value                                               | 0.1074           |
| Data                                                  |                  |
| Controls ( <i>Aspergillus</i> colonization n=8)       | 8                |
| Patients ( <i>Aspergillus</i> tracheobronchitis n=11) | 11               |

D

Betaglucan in serum  
*Aspergillus* tracheobronchitis vs  
colonization or no evidence of fungi

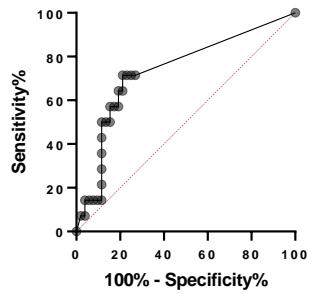

| Area under the ROC curve                              |                  |
|-------------------------------------------------------|------------------|
| Area                                                  | 0.7342           |
| Std. Error                                            | 0.07927          |
| 95% confidence interval                               | 0.5788 to 0.8896 |
| P value                                               | 0.0075           |
| Data                                                  |                  |
| Controls (AspCol+NoFungi)                             | 52               |
| Patients ( <i>Aspergillus</i> tracheobronchitis n=14) | 14               |

Betaglucan in BALF  
*Aspergillus* tracheobronchitis vs  
colonization or no evidence of fungi

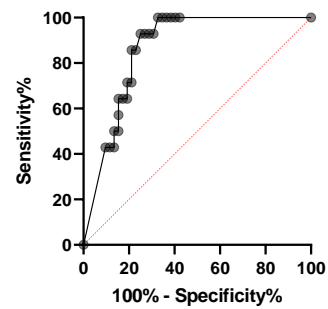

| Area under the ROC curve                              |                |
|-------------------------------------------------------|----------------|
| Area                                                  | 0.864          |
| Std. Error                                            | 0.0437         |
| 95% confidence interval                               | 0.778 to 0.950 |
| P value                                               | <0.0001        |
| Data                                                  |                |
| Controls (AspCol+NoFungi)                             | 52             |
| Patients ( <i>Aspergillus</i> tracheobronchitis n=14) | 14             |

Neutrophils in BALF  
*Aspergillus* tracheobronchitis vs  
colonization or no evidence of fungi

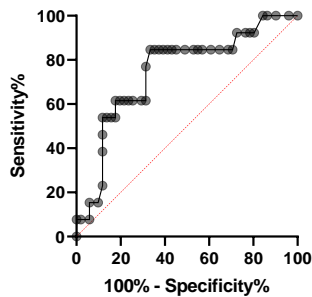

| Area under the ROC curve                              |                  |
|-------------------------------------------------------|------------------|
| Area                                                  | 0.7459           |
| Std. Error                                            | 0.07694          |
| 95% confidence interval                               | 0.5950 to 0.8967 |
| P value                                               | 0.0065           |
| Data                                                  |                  |
| Controls (AspCol+NoFungi)                             | 51               |
| Patients ( <i>Aspergillus</i> tracheobronchitis n=13) | 13               |

Galactomannan in BALF  
*Aspergillus* tracheobronchitis vs  
colonization or no evidence of fungi

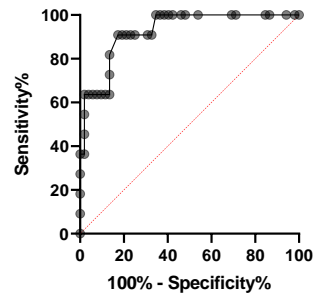

| Area under the ROC curve                              |                  |
|-------------------------------------------------------|------------------|
| Area                                                  | 0.9257           |
| Std. Error                                            | 0.03721          |
| 95% confidence interval                               | 0.8528 to 0.9986 |
| P value                                               | <0.0001          |
| Data                                                  |                  |
| Controls (AspCol+NoFungi)                             | 52               |
| Patients ( <i>Aspergillus</i> tracheobronchitis n=11) | 11               |
